# Supplementary material for: Controlled synthesis of branched poly(vinyl acetate)s by xanthate-mediated RAFT self-condensing vinyl (co)polymerization
Source: Royal Society of Chemistry journal article supplement (doi:10.1039/c1py00231g), 2011-01-01

ESI

## Controlled Synthesis of Branched Poly(vinyl acetate)s by Xanthate-Mediated RAFT Self-Condensing Vinyl (co)Polymerization

Julien Schmitt, Nicolas Blanchard and Julien Poly

Typical  $^1\text{H}$  NMR spectra of linear and branched poly(vinyl acetate)s synthesized by xanthate-mediated RAFT polymerization. Experimental conditions:  $\text{CDCl}_3$ ; 300 MHz; 64 scans.

Typical spectrum of a linear PVAc (see Table 1, entry 1)

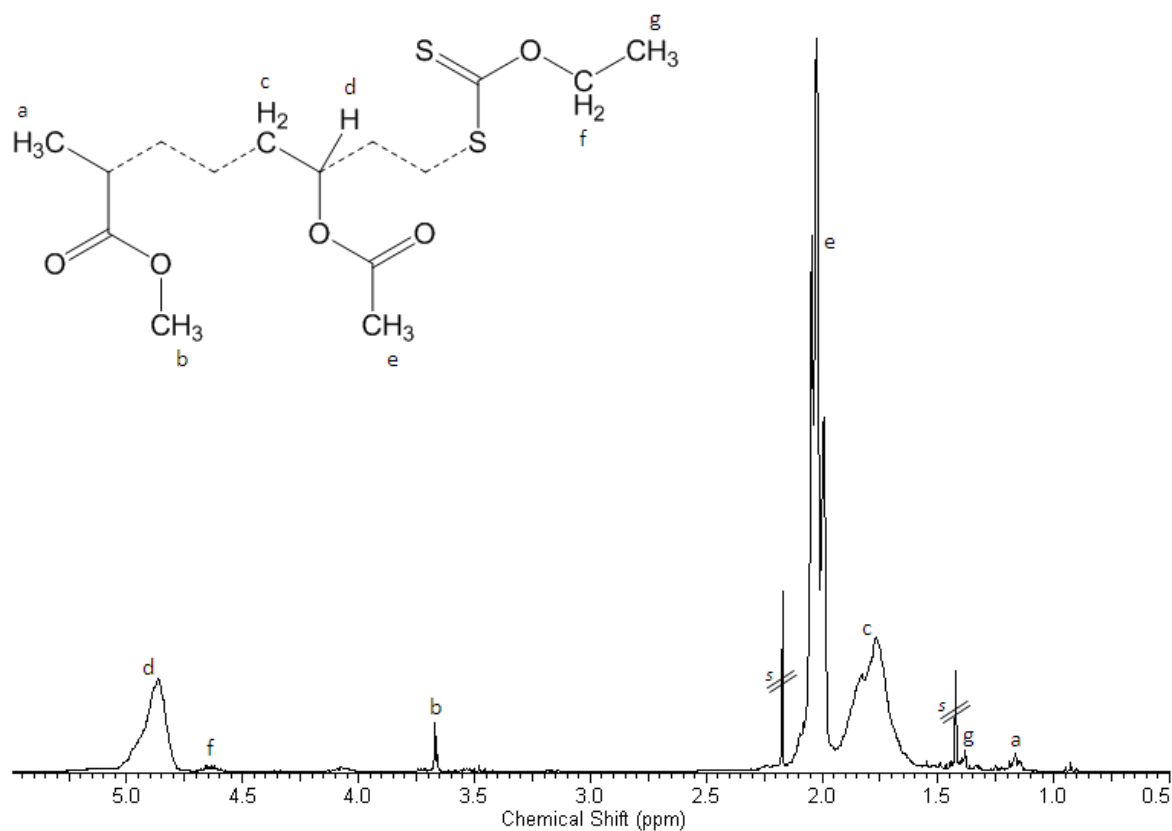

Typical spectrum of a branched PVAc (see Table 1, entry 7)

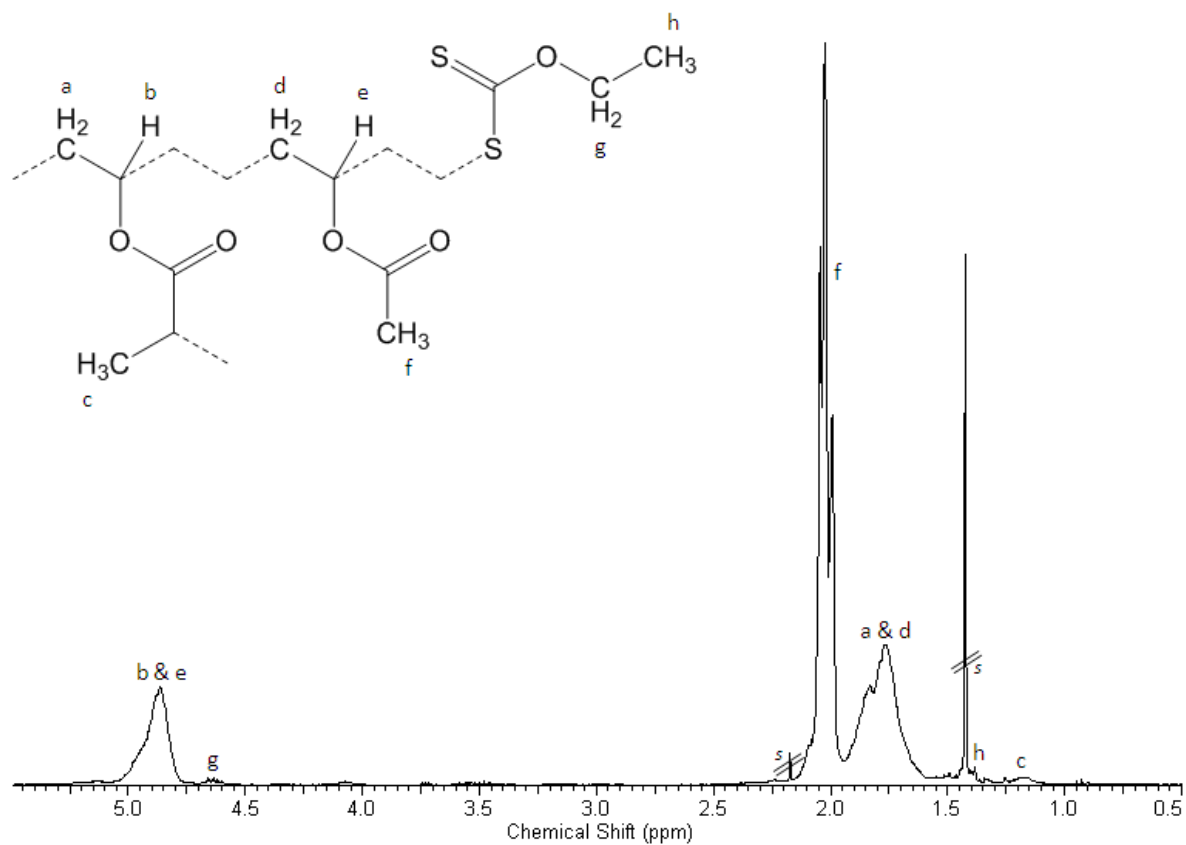

Supplement: c1py00231g.pdf [file c1py00231g.pdf]
